# Supplementary material for: SHS-GC-MS applied in Coffea arabica and Coffea canephora blend assessment
Source: Royal Society of Chemistry journal article supplement (doi:10.1039/d3ay00510k), 2023-01-01
Supplement: d3ay00510k1.pdf [file d3ay00510k1.pdf]

## SUPPLEMENTARY MATERIAL

SHS-GC-MS applied in *Coffea arabica* and *Coffea canephora* blends assessment

Marcos Valério Vieira Lyrio<sup>a</sup>, Pedro Henrique Pereira da Cunha<sup>a</sup>, Danieli Grancieri Debona<sup>a</sup>, Bárbara Zani Agnoletti<sup>a</sup>, Bruno Quirino Araújo<sup>a</sup>, Roberta Quintino Frinhani<sup>a</sup>, Paulo Roberto Filgueiras<sup>a\*</sup>, Lucas Louzada Pereira<sup>b</sup>, and Eustaquio Vinicius Ribeiro de Castro<sup>a</sup>

<sup>a</sup>Federal University of Espírito Santo/UFES, Department of Chemistry, Campus Goiabeiras, Avenida Fernando Ferrari, 514, CEP 29075-910 Vitória, Espírito Santo, Brazil.

<sup>b</sup>Federal Institute of Espírito Santo, Department of Food Science and Technology, Avenida Elizabeth Minete Perim, S/N, Bairro São Rafael, CEP 29375-000 Venda Nova do Imigrante, Espírito Santo, Brazil.

\*Corresponding author: filgueiras.pr@gmail.com

Number of figures and tables: **8**

### Supplementary Materials Captions:

**Fig. S1.** Loading plot of PLS-DA model for samples data from (A) GC-MS TIC, (B) GC-MS EIC, and (C) FTIR. VIP Score of PLS-DA model for samples data from (D) GC-MS TIC, (E) GC-MS EIC, and (F) FTIR. The compounds are labeled according to elution order in Table 1S.

**Fig. S2.** VIP score for PLS models with data from (A) GC-MS TIC and (B) GC-MS EIC. The compounds are labeled according to elution order in **Table 1S**.

**Fig. S3.** VIP score for PLS model with FTIR data.

**Fig. S4.** Variable selection result for FTIR data with **(A)** siPLS and **(B)** UVE-PLS.

**Fig. S5.** Residuals plot for PLS models.

**Table S1.** Identified compounds for arabica and conilon coffee by gas chromatography-mass spectrometry.

**Table S2.** Confusion matrix for PLS-DA model.

**Table S3.** Performance parameters for training and prediction set of PLS-DA model.

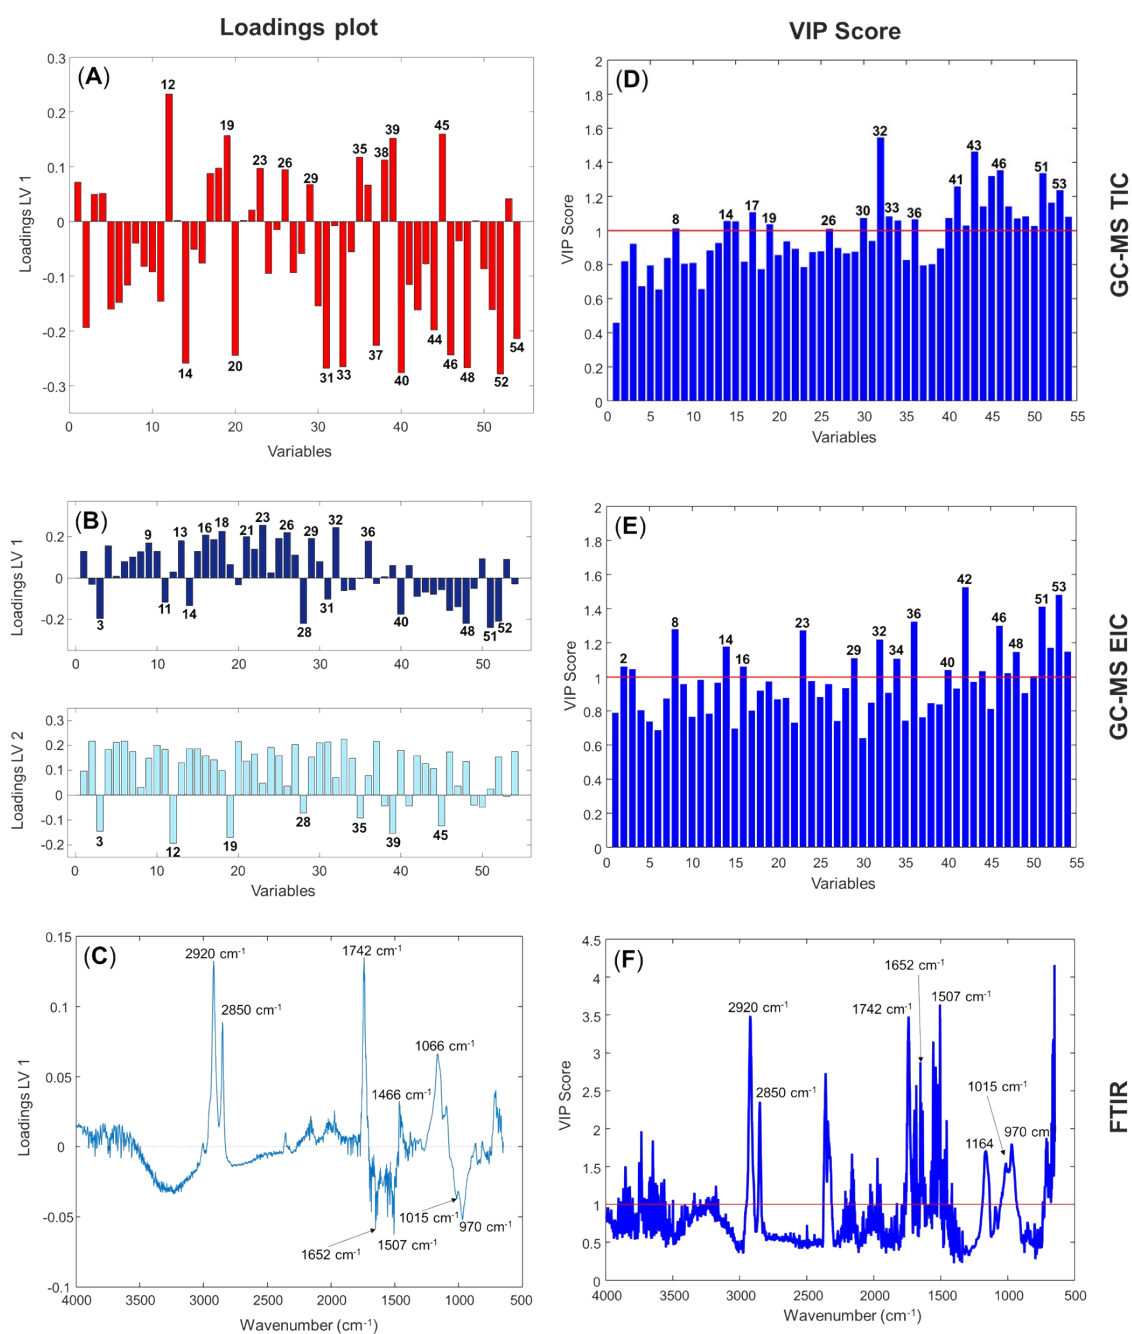

**Fig. S1.** Loading plot of PLS-DA model for samples data from **(A)** GC-MS TIC, **(B)** GC-MS EIC, and **(C)** FTIR. VIP Score of PLS-DA model for samples data from **(D)** GC-MS TIC, **(E)** GC-MS EIC, and **(F)** FTIR. The compounds are labeled according to elution order in **Table 1S**.

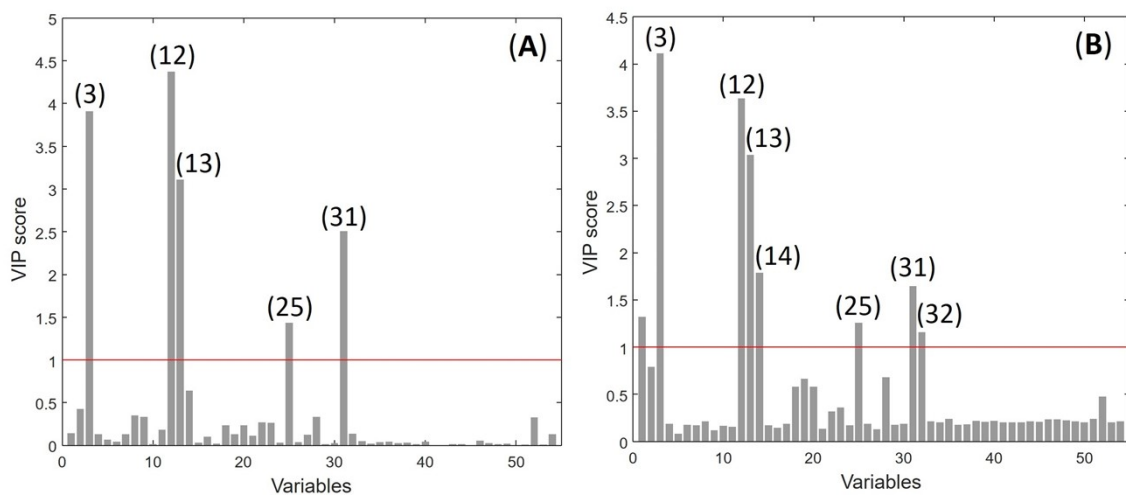

**Fig. S2.** VIP score for PLS models with data from (A) GC-MS TIC and (B) GC-MS EIC. The compounds are labeled according to elution order in **Table 1S**.

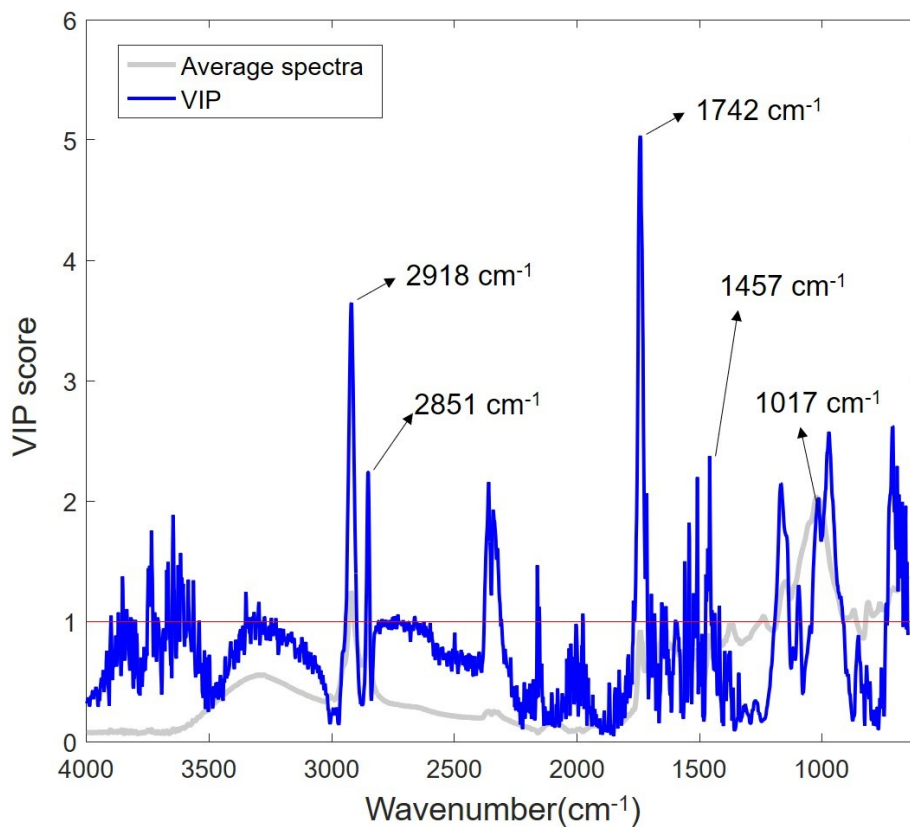

**Fig. S3.** VIP score for PLS model with FTIR data.

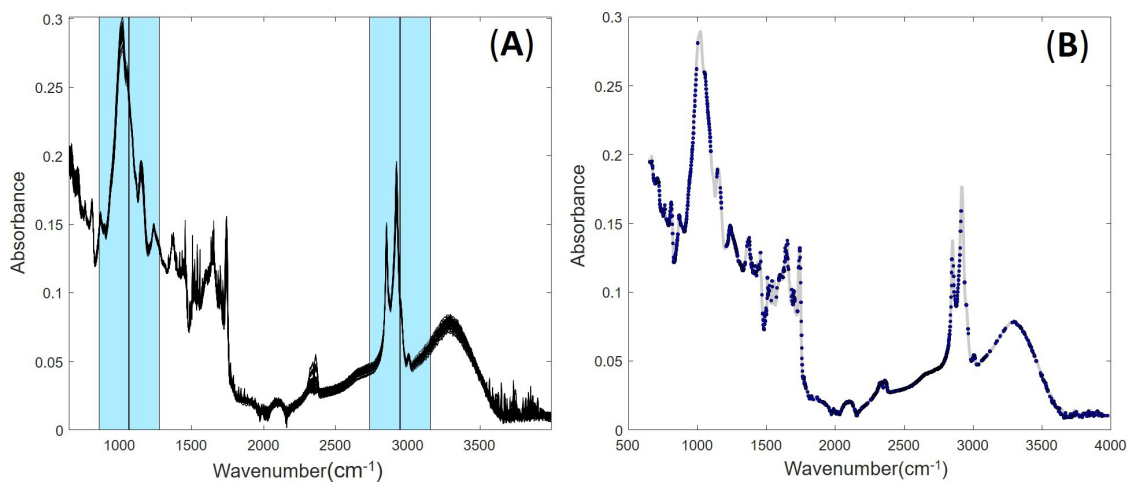

**Fig. S4.** Variable selection result for FTIR data with **(A)** siPLS and **(B)** UVE-PLS.

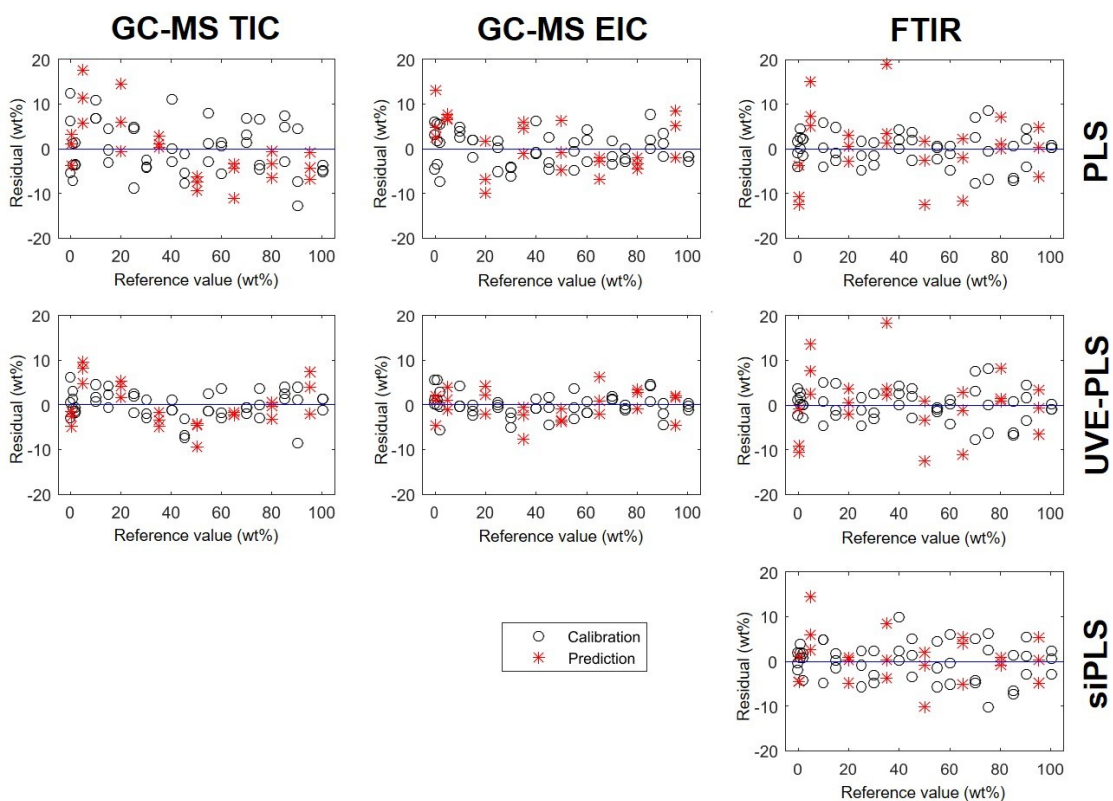

**Fig. S5.** Residuals plot for PLS models.

**Table S1.** Chemical compounds of arabica and conilon coffees identified by SHS-GC-MS.

| Peak | tR (min) | Compounds                            | LRI  | target (m/z) | Class           |
|------|----------|--------------------------------------|------|--------------|-----------------|
| 1    | 6.650    | Dihydro-2-methyl-3(2H)-Furanone      | 1260 | 43           | Furanone        |
| 2    | 7.309    | Acetoin                              | 1288 | 45           | Ketone          |
| 3    | 7.741    | 1-Hydroxy-propan-2-one               | 1305 | 43           | Ketone          |
| 4    | 8.649    | 2-Hydroxy-pentan-3-one               | 1339 | 59           | Ketone          |
| 5    | 8.739    | 2,3-Dimethylpyrazine                 | 1342 | 108          | Pyrazine        |
| 6    | 8.917    | 1-Hydroxy-pentan-2-one               | 1349 | 82           | Ketone          |
| 7    | 9.119    | 2-Methylpropyl 2-hydroxypropanoate   | 1356 | 45           | Ester           |
| 8    | 9.603    | 1-Hydroxy-butan-2-one                | 1374 | 57           | Ketone          |
| 9    | 10.487   | 2,5-Furandione                       | 1406 | 54           | Anhydride       |
| 10   | 11.222   | Ethenylpyrazine                      | 1432 | 106          | Pyrazine        |
| 11   | 11.458   | 3-Ethyl-3,5-dimethylpyrazine         | 1440 | 135          | Pyrazine        |
| 12   | 11.493   | Acetic acid                          | 1442 | 43           | Carboxylic acid |
| 13   | 12.079   | Furfural                             | 1462 | 96           | Furan           |
| 14   | 12.377   | 1-(Acetyloxy)-propan-2-one           | 1473 | 43           | Ester           |
| 15   | 12.608   | 3,5-Diethyl-2-methylpyrazine         | 1481 | 120          | Pyrazine        |
| 16   | 12.993   | 2,5-Dimethyl-3(2H)-furanone          | 1494 | 112          | Furanone        |
| 17   | 13.069   | Furfuryl formate                     | 1497 | 81           | Furan           |
| 18   | 13.147   | 2-Acetylfuran                        | 1500 | 95           | Furan           |
| 19   | 13.379   | Formic acid                          | 1508 | 46           | Carboxylic acid |
| 20   | 13.455   | Pyrrole                              | 1511 | 67           | Pyrrole         |
| 21   | 13.639   | 1-(2-Furyl)-propan-2-one             | 1517 | 81           | Furan           |
| 22   | 14.177   | 2-Acetoxyethylfuran                  | 1536 | 81           | Furan           |
| 23   | 14.265   | Propanoic acid                       | 1540 | 74           | Carboxylic acid |
| 24   | 14.587   | 2-Methyl-1H-pyrrole                  | 1551 | 80           | Pyrrole         |
| 25   | 15.058   | 5-Methyl-2-furancarboxaldehyde       | 1568 | 110          | Furan           |
| 26   | 15.318   | Cyclopent-4-ene-1,3-dione            | 1577 | 68           | Ketone          |
| 27   | 16.197   | 1-Methyl-1H-Pyrrole-2-carboxaldehyde | 1610 | 108          | Pyrrole         |
| 28   | 16.395   | Butyrolactone                        | 1618 | 42           | Furanone        |
| 29   | 16.770   | Butanoic acid                        | 1634 | 60           | Carboxylic acid |
| 30   | 17.186   | 2-Acetyl-1-methylpyrrole             | 1652 | 108          | Pyrrole         |
| 31   | 17.849   | 2-Furanmethanol                      | 1680 | 98           | Furan           |
| 32   | 17.884   | 3-Methylbutanoic acid                | 1682 | 60           | Carboxylic acid |
| 33   | 19.169   | N-Acetyl-4(H)-pyridine               | 1733 | 80           | Pyridine        |

*to be continued*

*continuation*

| Peak | tR<br>(min) | Compounds                                     | LRI  | target<br>(m/z) | Class           |
|------|-------------|-----------------------------------------------|------|-----------------|-----------------|
| 34   | 19.518      | 5-Methyl-2-furanmethanol                      | 1746 | 95              | Furan           |
| 35   | 19.870      | 2(5H)-Furanone                                | 1760 | 55              | Furanone        |
| 36   | 21.093      | 3-Methyl-but-2-enoic acid                     | 1809 | 100             | Carboxylic acid |
| 37   | 21.565      | N-Furfurylpyrrole                             | 1834 | 81              | Furan           |
| 38   | 21.658      | 2-Hydroxy-3-methyl-Cyclopent-2-en-1-one       | 1838 | 112             | Ketone          |
| 39   | 22.110      | 2,3-Dihydro-5-hydroxy-6-methyl-4H-pyran-4-one | 1862 | 128             | Pyranone        |
| 40   | 22.168      | 2-Methoxyphenol                               | 1865 | 124             | Phenol          |
| 41   | 22.718      | 3-Ethyl-2-hydroxy-Cyclopent-2-en-1-one        | 1893 | 126             | Ketone          |
| 42   | 23.121      | 2-Phenylethanol                               | 1921 | 91              | Alcohol         |
| 43   | 23.507      | 2-Thiophenemethanol                           | 1942 | 114             | Thiophene       |
| 44   | 23.794      | 2-Acetylpyrrole                               | 1968 | 109             | Pyrrole         |
| 45   | 24.215      | Methyl 2-furoate                              | 2007 | 95              | Furan           |
| 46   | 24.239      | Phenol                                        | 2009 | 94              | Phenol          |
| 47   | 24.421      | 1H-Pyrrole-2-carboxaldehyde                   | 2026 | 95              | Pyrrole         |
| 48   | 24.472      | 4-Ethylguaiacol                               | 2031 | 137             | Phenol          |
| 49   | 24.601      | 2,5-Dimethyl-4-hydroxy-3(2H)-furanone         | 2042 | 128             | Furanone        |
| 50   | 24.915      | 5-Acetyldihydro-2(3H)-furanone                | 2071 | 85              | Furanone        |
| 51   | 25.135      | Triacetin                                     | 2091 | 43              | Ester           |
| 52   | 26.232      | 4-Vinylguaiacol                               | 2204 | 150             | Phenol          |
| 53   | 28.932      | 5-Hydroxymethylfurfural                       | 2531 | 97              | Furan           |
| 54   | 35.639      | Caffeine                                      | 3160 | 194             | Xanthine        |

tR – retention time (minutes); LRI – Linear retention indices calculated for VB-WAX column. The calculated LRI were compared with reference values from literature data.<sup>1-29</sup>

**Table S2.** Confusion matrix for PLS-DA model

|                     |         | Training (n = 70)   |         |         |         |              |
|---------------------|---------|---------------------|---------|---------|---------|--------------|
| Reference\predicted |         | Class 1             | Class 2 | Class 3 | Class 4 | Not-assigned |
| GC-MS<br>TIC        | Class 1 | 13                  | 0       | 0       | 0       | 0            |
|                     | Class 2 | 0                   | 11      | 0       | 1       | 1            |
|                     | Class 3 | 0                   | 0       | 24      | 0       | 1            |
|                     | Class 4 | 0                   | 0       | 0       | 18      | 1            |
| GC-MS<br>EIC        | Class 1 | 11                  | 0       | 1       | 0       | 1            |
|                     | Class 2 | 0                   | 11      | 0       | 0       | 2            |
|                     | Class 3 | 0                   | 0       | 24      | 0       | 1            |
|                     | Class 4 | 0                   | 0       | 0       | 18      | 1            |
| FTIR                | Class 1 | 13                  | 0       | 0       | 0       | 0            |
|                     | Class 2 | 0                   | 11      | 0       | 1       | 1            |
|                     | Class 3 | 0                   | 0       | 24      | 0       | 1            |
|                     | Class 4 | 0                   | 0       | 1       | 17      | 1            |
|                     |         | Prediction (n = 29) |         |         |         |              |
| Reference\predicted |         | Class 1             | Class 2 | Class 3 | Class 4 | Not-assigned |
| GC-MS<br>TIC        | Class 1 | 5                   | 0       | 0       | 0       | 0            |
|                     | Class 2 | 0                   | 4       | 0       | 0       | 1            |
|                     | Class 3 | 0                   | 0       | 10      | 0       | 1            |
|                     | Class 4 | 0                   | 0       | 0       | 8       | 0            |
| GC-MS<br>EIC        | Class 1 | 5                   | 0       | 0       | 0       | 0            |
|                     | Class 2 | 0                   | 4       | 0       | 0       | 1            |
|                     | Class 3 | 0                   | 0       | 11      | 0       | 0            |
|                     | Class 4 | 0                   | 0       | 1       | 7       | 0            |
| FTIR                | Class 1 | 5                   | 0       | 0       | 0       | 0            |
|                     | Class 2 | 0                   | 4       | 0       | 1       | 0            |
|                     | Class 3 | 0                   | 0       | 10      | 0       | 1            |
|                     | Class 4 | 0                   | 0       | 0       | 8       | 0            |

**Table S3.** Performance parameters for training and prediction set of PLS-DA model.

| Model                      | Class   | Sensitivity | Specificity | Accuracy | Error rate | Not-assigned |
|----------------------------|---------|-------------|-------------|----------|------------|--------------|
|                            |         | (%)         |             |          |            |              |
| <b>Training (n = 70)</b>   |         |             |             |          |            |              |
| GC-MS TIC                  | Class 1 | 100         | 100         | 99       | 2          | 4            |
|                            | Class 2 | 92          | 100         |          |            |              |
|                            | Class 3 | 100         | 100         |          |            |              |
|                            | Class 4 | 100         | 98          |          |            |              |
| GC-MS EIC                  | Class 1 | 92          | 100         | 98       | 2          | 7            |
|                            | Class 2 | 100         | 100         |          |            |              |
|                            | Class 3 | 100         | 98          |          |            |              |
|                            | Class 4 | 100         | 100         |          |            |              |
| FTIR                       | Class 1 | 100         | 100         | 97       | 3          | 4            |
|                            | Class 2 | 92          | 100         |          |            |              |
|                            | Class 3 | 100         | 98          |          |            |              |
|                            | Class 4 | 94          | 98          |          |            |              |
| <b>Prediction (n = 29)</b> |         |             |             |          |            |              |
| GC-MS TIC                  | Class 1 | 100         | 100         | 100      | 0          | 7            |
|                            | Class 2 | 100         | 100         |          |            |              |
|                            | Class 3 | 100         | 100         |          |            |              |
|                            | Class 4 | 100         | 100         |          |            |              |
| GC-MS EIC                  | Class 1 | 100         | 100         | 96       | 3          | 3            |
|                            | Class 2 | 100         | 100         |          |            |              |
|                            | Class 3 | 100         | 94          |          |            |              |
|                            | Class 4 | 88          | 100         |          |            |              |
| FTIR                       | Class 1 | 100         | 100         | 96       | 5          | 3            |
|                            | Class 2 | 80          | 100         |          |            |              |
|                            | Class 3 | 100         | 100         |          |            |              |
|                            | Class 4 | 100         | 95          |          |            |              |



## References

- 1 A. Amanpour and S. Selli, *J. Food Process. Preserv.*, 2016, **40**, 1116–1124.
- 2 M. Amrani-Hemaimi, C. Cerny and L. B. Fay, *J. Agric. Food Chem.*, 1995, **43**, 2818–2822.
- 3 S. Bi, A. Wang, F. Lao, Q. Shen, X. Liao, P. Zhang and J. Wu, *Food Chem.*, 2021, **339**, 127878.
- 4 S. Birtić, C. Ginies, M. Causse, C. M. G. C. Renard and D. Page, *J. Agric. Food Chem.*, 2009, **57**, 591–598.
- 5 M. Cardinal, M. Chaussy, C. Donnay-Moreno, J. Cornet, C. Rannou, C. Fillonneau, C. Prost, R. Baron and P. Courcoux, *Food Res. Int.*, 2020, **134**, 109254.
- 6 J. S. Elmore, J. K. Parker, N. G. Halford, N. Muttucumaru and D. S. Mottram, *J. Agric. Food Chem.*, 2008, **56**, 6173–6179.
- 7 W. Fan and M. C. Qian, *J. Agric. Food Chem.*, 2005, **53**, 7931–7938.
- 8 V. Ferreira, F. S. Juan, A. Escudero, L. Culleré, P. Fernández-Zurbano, M. P. Saenz-Navajas and J. Cacho, *J. Agric. Food Chem.*, 2009, **57**, 7490–7498.
- 9 O. Gonzalez-Rios, M. L. Suarez-Quiroz, R. Boulanger, M. Barel, B. Guyot, J. P. Guiraud and S. Schorr-Galindo, *J. Food Compos. Anal.*, 2007, **20**, 297–307.
- 10 A. Hallier, C. Prost and T. Serot, *J. Agric. Food Chem.*, 2005, **53**, 7204–7211.
- 11 M. Ishikawa, O. Ito, S. Ishizaki, Y. Kurobayashi and A. Fujita, *Flavour Fragr. J.*, 2004, **19**, 183–187.
- 12 A. Korkmaz, A. A. Hayaloglu and A. F. Atasoy, *LWT - Food Sci. Technol.*, 2017, **84**, 842–850.

- 13 U. Krings, K. Zelena, S. Wu and R. G. Berger, *Eur. Food Res. Technol.*, 2006, **223**, 675–681.
- 14 K. G. Lee, S. E. Lee, G. R. Takeoka, J. H. Kim and B. S. Park, *J. Sci. Food Agric.*, 2005, **85**, 1580–1586.
- 15 I. López-Galilea, N. Fournier, C. Cid and E. Guichard, *J. Agric. Food Chem.*, 2006, 8560–8566.
- 16 T. Luo, W. Fan and Y. Xu, *J. Inst. Brew.*, 2008, **114**, 172–179.
- 17 M. S. Madruga and D. S. Mottram, *J. Braz. Chem. Soc.*, 1998, **9**, 261–271.
- 18 H. Mayorga, H. Knapp, P. Winterhalter and C. Duque, *J. Agric. Food Chem.*, 2001, **49**, 1904–1908.
- 19 C. Osorio, M. Alarcon, C. Moreno, A. Bonilla, J. Barrios, C. Garzon and C. Duque, *J. Agric. Food Chem.*, 2006, **54**, 509–516.
- 20 M. A. Pozo-Bayon, A. Ruiz-Rodriguez, K. Pernin and N. Cayot, *J. Agric. Food Chem.*, 2007, **55**, 1418–1426.
- 21 B. S. Radovic, M. Careri, A. Mangia, M. Musci, M. Gerboles and E. Anklam, *Food Chem.*, 2001, **72**, 511–520.
- 22 S. Rochat, J. Egger and A. Chaintreau, *J. Chromatogr. A*, 2009, **1216**, 6424–6432.
- 23 I. Steen, S. S. Waehrens, M. A. Petersen, M. Münchow and W. L. P. Bredie, *Food Chem.*, 2017, **219**, 61–68.
- 24 K. Umamo, Y. Hagi, K. Nakahara, A. Shyoji and T. Shibamoto, *J. Agric. Food Chem.*, 1995, **43**, 2212–2218.
- 25 J. E. Welke, V. Manfroi, M. Zanusi, M. Lazarotto and C. Alcaraz Zini, *J. Chromatogr. A*, 2012, **1226**, 124–139.
- 26 X. Xu, M. Yu, J. Raza, H. Song, L. Gong and W. Pan, *Lwt*, 2021, **137**, 110371.
- 27 K. Yanagimoto, H. Ochi, K.-G. Lee and T. Shibamoto, *J. Agric. Food*

*Chem.*, 2004, 592–596.

- 28 P. Yang, H. Song, L. Wang and H. Jing, *J. Agric. Food Chem.*, 2019, **67**, 7926–7934.
- 29 M. Yokoi and M. Shimoda, *J. Chromatogr. Sci.*, 2017, **55**, 373–377.
